# Supplementary material
Source: HighWire-hosted journal article supplement (https://hw-f5-jim.highwire.org/content/68/4/893)
Supplement: inline-supplementary-material-1 [file inline-supplementary-material-1.pdf]

**Supplementary Table 1 miScript primers used in this study**

| ID          | Sequences                                                                            |
|-------------|--------------------------------------------------------------------------------------|
| miR-92a-3p  | Forward: 5'- TCATAGCGCTACGGAGAAGC-3'<br>Reverse: 5'- ATCGTGCTCTTGTACCAGCC-3'         |
| miR-153-3p  | Forward: 5'- CTCACAGCTGCCAGTGTCAATT -3'<br>Reverse: 5'- CACTTTTGTGACTATGCAACTGGA -3' |
| miR-524-5p  | Forward: 5'- GCTGTGACCCTACAAAGGGA -3'<br>Reverse: 5'- ACCGTAACACTCCAAAGGGA -3'       |
| miR-885-5p  | Forward: 5'- CCGCACTCTCTCCATTACT -3'<br>Reverse: 5'- CGTGCTCTATCCACTACACCC -3'       |
| miR-130a-3p | Forward: 5'- GGCCAGAGCTCTTTTCACAT -3'<br>Reverse: 5'- CGGCCAATGCCCTTTTAACAT -3'      |
| miR-195-3p  | Forward: 5'- AGCTTCCCTGGCTCTAGCA -3'<br>Reverse: 5'- CTGGAGCAGCACAGCCAATA -3'        |
| miR-608     | Forward: 5'- TGTTGGGACAGCTCCGTTTA -3'<br>Reverse: 5'- GTGCTGCACCAAGAGGCA -3'         |
| miR-335-5p  | Forward: 5'- GTTTTGAGCGGGGGTCAAG -3'<br>Reverse: 5'- AAATGAGAGGAGGTCAGGAGC -3'       |
| miR-514b-3p | Forward: 5'- TGTGGTACTCTTCTCAAGAGGG -3'<br>Reverse: 5'- ACTCCACTCACAGAGGTGTC -3'     |
| miR-548a-5p | Forward: 5'- CAGCTGGGTGCTCAGCCAGG -3'<br>Reverse: 5'- GGCAACTTAATGTTTCTTGC -3'       |
| miR-887     | Forward: 5'- TCCTTGGGAGCCCTGTTAGA -3'<br>Reverse: 5'- CTGTGCAAAGCCTCGGGAT -3'        |
| let-7i-3p   | Forward: 5'- GGCTGAGGTAGTAGTTTGTGCT -3'<br>Reverse: 5'- AGCTTGCGCAGTTATCTCCA -3'     |
| miR-22-3p   | Forward: 5'- GCTGAGCCGCAGTAGTTCTT -3'<br>Reverse: 5'- GGCAGAGGGCAACAGTTCTT -3'       |
| U6          | Forward: 5'-CTCGCTTCGGCAGCACACA-3'<br>Reverse: 5'-AACGCTTCACGAATTTGCGT-3'            |

**Supplementary Table 2 Differentially expressed miRNAs in plasma exosomes.**

| ID               | FoldChange | P        |
|------------------|------------|----------|
| hsa-miR-3190-3p  | 28.87288   | 1.18E-07 |
| hsa-miR-153      | 24.01663   | 2.14E-07 |
| hsa-miR-3940-3p  | 21.06453   | 7.81E-08 |
| hsa-miR-92a-3p   | 11.15072   | 2.99E-09 |
| hsa-let-7i-3p    | 9.674283   | 0.001599 |
| hsa-miR-524-5p   | 6.939742   | 5.53E-07 |
| hsa-miR-195-3p   | 5.592459   | 3.69E-06 |
| hsa-miR-608      | 5.258283   | 2.92E-05 |
| hsa-miR-4795-5p  | 5.125485   | 6.97E-08 |
| hsa-miR-1268b    | 4.616073   | 0.002515 |
| hsa-miR-885-5p   | 4.138253   | 1.35E-07 |
| hsa-miR-887      | 3.950311   | 0.00011  |
| hsa-miR-514b-3p  | 3.741906   | 5.83E-05 |
| hsa-miR-22-3p    | 3.571621   | 0.00291  |
| hsa-miR-548as-3p | 3.564426   | 1.78E-05 |
| hsa-miR-4701-3p  | 3.458588   | 5.58E-06 |
| hsa-miR-130a-3p  | 3.306801   | 3.17E-08 |
| hsa-miR-548a-5p  | 3.30642    | 6.86E-05 |
| hsa-miR-335-5p   | 3.164639   | 1.24E-05 |
| hsa-miR-4523     | 3.045706   | 4.79E-08 |
| hsa-miR-5695     | 0.329827   | 1.00E-06 |
| hsa-miR-3908     | 0.328265   | 1.89E-05 |
| hsa-miR-4747-3p  | 0.327349   | 1.86E-05 |
| hsa-miR-514b-5p  | 0.32518    | 0.001616 |
| hsa-miR-4675     | 0.313078   | 4.81E-11 |
| hsa-miR-362-5p   | 0.310948   | 9.36E-08 |
| hsa-miR-4699-5p  | 0.307866   | 4.20E-05 |
| hsa-miR-521      | 0.293393   | 9.87E-05 |
| hsa-miR-802      | 0.292061   | 5.01E-09 |
| hsa-miR-3929     | 0.283426   | 0.000325 |
| hsa-miR-5581-3p  | 0.273863   | 0.000175 |
| hsa-miR-4800-3p  | 0.255235   | 3.84E-10 |
| hsa-miR-5100     | 0.248308   | 1.14E-06 |
| hsa-miR-3117-3p  | 0.227386   | 1.06E-05 |
| hsa-miR-612      | 0.216368   | 4.23E-09 |
| hsa-miR-3679-3p  | 0.198465   | 7.81E-06 |
| hsa-miR-1263     | 0.197815   | 5.74E-07 |
| hsa-miR-99b-5p   | 0.195016   | 6.93E-11 |
| hsa-miR-3144-5p  | 0.191979   | 4.74E-07 |
| hsa-miR-616-5p   | 0.184315   | 7.72E-10 |
| hsa-miR-5589-5p  | 0.183477   | 5.61E-10 |

---

|                  |          |          |
|------------------|----------|----------|
| hsa-miR-924      | 0.1801   | 3.93E-09 |
| hsa-miR-128      | 0.171804 | 0.000344 |
| hsa-miR-485-5p   | 0.149569 | 1.01E-09 |
| hsa-miR-766-3p   | 0.140316 | 2.55E-13 |
| hsa-miR-503      | 0.13403  | 5.12E-08 |
| hsa-miR-484      | 0.12495  | 3.04E-12 |
| hsa-miR-92a-2-5p | 0.112532 | 9.82E-10 |
| hsa-miR-4419b    | 0.089653 | 1.68E-08 |
| hsa-miR-4535     | 0.072785 | 0.000754 |
| hsa-miR-571      | 0.070172 | 1.31E-08 |
| hsa-miR-4697-3p  | 0.064688 | 1.86E-07 |
| hsa-miR-3682-5p  | 0.059256 | 2.63E-08 |
| hsa-miR-1271-5p  | 0.050659 | 5.89E-07 |
| hsa-miR-876-3p   | 0.045439 | 1.48E-06 |
| hsa-miR-487b     | 0.044993 | 1.02E-08 |
| hsa-miR-1912     | 0.032158 | 0.002407 |

---
